# Supplementary material
Source: MDPI journal article supplement (https://www.mdpi.com/2306-5710/9/1/22)
Supplement: s1 [file s1]

## SUPPLEMENTARY MATERIAL

**Table S1.** Centesimal compositional and physicochemical characteristic of Brazil nut beverage

**Table S2.** Inactivation of *E. coli* (CECT 434) (~10<sup>8</sup> CFU/ml) by HPH of the Brazil nut beverage

**Table S3.** Physicochemical characteristics of the Brazil nut beverage (BBN) treated by high-pressure homogenization (HPH) and pasteurization (PAS) and stored preserved at 5°C for 21 days.

**Table S4.** TBA values (µg MDA/ mL) of the Brazil nut beverage treated by HPH (T1, T2 and T3) and pasteurization (PAS) and stored at 5 °C for 21 days

**Table S1.** Centesimal compositional and physicochemical characteristic of Brazil nut beverage

| <b>Composition/ Physicochemical</b> | <b>BNB 1</b>            | <b>BNB 2</b>            | <b>BNB 3</b>           |
|-------------------------------------|-------------------------|-------------------------|------------------------|
| <i>Total solid (%<i>, w/w</i>)</i>  | 4.8 ±0.5 <sup>a</sup>   | 7.1 ±0.3 <sup>c</sup>   | 5.7 ±0.1 <sup>b</sup>  |
| <i>Wet (%<i>, w/w</i>)</i>          | 95.2 ±0.4 <sup>b</sup>  | 92.9 ±0.3 <sup>a</sup>  | 94.3 ±0.3 <sup>b</sup> |
| <i>Lipid total (%<i>, w/w</i>)</i>  | 2.8 ±0.4 <sup>a</sup>   | 3.4 ±0.2 <sup>b</sup>   | 2.9 ±0.0 <sup>a</sup>  |
| <i>Protein (%<i>, w/w</i>)</i>      | 1.2 ±0.1                | 1.18 ±0.0 <sup>a</sup>  | 1.27 ±0.0 <sup>b</sup> |
| <i>Carbohydrate (%<i>, w/w</i>)</i> | 0.93 ±0.4 <sup>a</sup>  | 2.36 ±0.2 <sup>b</sup>  | 1.06 ±0.2 <sup>a</sup> |
| <i>Ash (%<i>, w/w</i>)</i>          | 0.15 ±0.01 <sup>a</sup> | 0.15 ±0.02 <sup>a</sup> | 0.14 ±0.0 <sup>a</sup> |
| <i>pH</i>                           | 6.7 ±0.1 <sup>a</sup>   | 6.6 ±0.1 <sup>a</sup>   | 6.65 ±0.1 <sup>a</sup> |
| <i>Acidity (%<i>, w/v</i>)</i>      | 0.02 ±0.0 <sup>a</sup>  | 0.03 ±0.0 <sup>a</sup>  | 0.03 ±0.0 <sup>a</sup> |
| <i>°Brix</i>                        | 2.3 ±0.1 <sup>a</sup>   | 2.5 ±0.1 <sup>b</sup>   | 2.23 ±0.1 <sup>a</sup> |

BNB 1, Beverage with reincorporation of 30% of fat fraction; BNB 2, Beverage of intermediate phase after repose by 5 h; BNB 3, Beverage of intermediate phase after repose by 15 h. The data are provided as mean value ± standard deviation (n = 3). Values with different letters in row are different (p < 0.05).

**Table S2.** Inactivation of *E. coli* (CECT 434) (~108 CFU/ml) by HPH of the Brazil nut beverage

| Pressure<br>(Mpa) | Log N <sub>0</sub> /N (CFU/mL) |                       |                       |
|-------------------|--------------------------------|-----------------------|-----------------------|
|                   | 25 °C                          | 55 °C                 | 75 °C                 |
| 50                | 0.6 ±0.1 <sup>a</sup>          | 1.3 ±0.0 <sup>b</sup> | 8.2 ±0.0 <sup>f</sup> |
| 100               | 1.7 ±0.1 <sup>b</sup>          | 5.0 ±0.1 <sup>d</sup> | 8.2 ±0.0 <sup>f</sup> |
| 150               | 3.9 ±0.1 <sup>c</sup>          | 6.1 ±0.4 <sup>e</sup> | 8.2 ±0.0 <sup>f</sup> |
| 180               | 8.0 ±0.4 <sup>f</sup>          | 8.1 ±0.2 <sup>f</sup> | 8.2 ±0.0 <sup>f</sup> |

The data are provided as mean value ± standard deviation (n = 3). Values with different letters in the same column or row are different (p < 0.05).

**Table S3.** Physicochemical characteristics of the Brazil nut beverage (BBN) treated by high-pressure homogenization (HPH) and pasteurization (PAS) and stored preserved at 5°C for 21 days.

| Parameters | Day | BNB                    | PAS                     | T1                      | T2                      | T3                      |
|------------|-----|------------------------|-------------------------|-------------------------|-------------------------|-------------------------|
| °Brix      | 0   | 2.6 ±0.1 <sup>A</sup>  | 2.9 ±0.1 <sup>Bb</sup>  | 4.1 ±0.1 <sup>Cab</sup> | 4.8 ±0.1 <sup>Da</sup>  | 5.3 ±0.1 <sup>Ea</sup>  |
|            | 2   | **                     | 2.9 ±0.2 <sup>b</sup>   | 4.2 ±0.1 <sup>ab</sup>  | 4.7 ±0.3 <sup>a</sup>   | 5.1 ±0.5 <sup>a</sup>   |
|            | 5   | **                     | 2.8 ±0.3 <sup>b</sup>   | 4.3 ±0.3 <sup>b</sup>   | 4.8 ±0.3 <sup>a</sup>   | 5.1 ±0.5 <sup>a</sup>   |
|            | 9   | **                     | 2.7 ±0.1 <sup>b</sup>   | 4.4 ±0.1 <sup>b</sup>   | 4.9 ±0.1 <sup>a</sup>   | 4.8 ±0.2 <sup>a</sup>   |
|            | 15  | **                     | 2.6 ±0.2 <sup>ab</sup>  | 4.0 ±0.1 <sup>ab</sup>  | 4.7 ±0.1 <sup>a</sup>   | 4.5 ±0.2 <sup>a</sup>   |
|            | 21  | **                     | 2.2 ±0.2 <sup>a</sup>   | 3.8 ±0.2 <sup>a</sup>   | 4.4 ±0.2 <sup>a</sup>   | 4.6 ±0.3 <sup>a</sup>   |
| pH         | 0   | 6.8 ±0.0 <sup>A</sup>  | 6.8 ±0.0 <sup>Abc</sup> | 6.8 ±0.1 <sup>Aa</sup>  | 6.7 ±0.0 <sup>Aa</sup>  | 6.7 ±0.0 <sup>Aa</sup>  |
|            | 2   | **                     | 6.8 ±0.0 <sup>c</sup>   | 6.8 ±0.0 <sup>a</sup>   | 6.7 ±0.0 <sup>a</sup>   | 6.7 ±0.0 <sup>a</sup>   |
|            | 5   | **                     | 6.8 ±0.0 <sup>c</sup>   | 6.7 ±0.0 <sup>a</sup>   | 6.7 ±0.1 <sup>a</sup>   | 6.7 ±0.0 <sup>a</sup>   |
|            | 9   | **                     | 6.6 ±0.0 <sup>a</sup>   | 6.7 ±0.0 <sup>a</sup>   | 6.7 ±0.0 <sup>a</sup>   | 6.7 ±0.0 <sup>a</sup>   |
|            | 15  | **                     | 6.7 ±0.0 <sup>ab</sup>  | 6.7 ±0.0 <sup>a</sup>   | 6.7 ±0.0 <sup>a</sup>   | 6.7 ±0.0 <sup>a</sup>   |
|            | 21  | **                     | 6.7 ±0.0 <sup>a</sup>   | 6.7 ±0.0 <sup>a</sup>   | 6.7 ±0.0 <sup>a</sup>   | 6.8 ±0.0 <sup>a</sup>   |
| Acidity    | 0   | 0.02 ±0.0 <sup>A</sup> | 0.02 ±0.0 <sup>Aa</sup> | 0.02 ±0.0 <sup>Aa</sup> | 0.02 ±0.0 <sup>Aa</sup> | 0.02 ±0.0 <sup>Aa</sup> |
|            | 2   | **                     | 0.02 ±0.0 <sup>a</sup>  | 0.02 ±0.0 <sup>a</sup>  | 0.02 ±0.0 <sup>a</sup>  | 0.02 ±0.0 <sup>a</sup>  |
|            | 5   | **                     | 0.02 ±0.0 <sup>a</sup>  | 0.02 ±0.0 <sup>a</sup>  | 0.02 ±0.0 <sup>a</sup>  | 0.02 ±0.0 <sup>a</sup>  |
|            | 9   | **                     | 0.03 ±0.0 <sup>b</sup>  | 0.02 ±0.0 <sup>a</sup>  | 0.02 ±0.0 <sup>a</sup>  | 0.02 ±0.0 <sup>a</sup>  |
|            | 15  | **                     | 0.03 ±0.0 <sup>b</sup>  | 0.02 ±0.0 <sup>a</sup>  | 0.02 ±0.0 <sup>a</sup>  | 0.02 ±0.0 <sup>a</sup>  |
|            | 21  | **                     | 0.03 ±0.0 <sup>b</sup>  | 0.02 ±0.0 <sup>a</sup>  | 0.02 ±0.0 <sup>a</sup>  | 0.02 ±0.0 <sup>a</sup>  |

The data are provided as mean value ± standard deviation (n = 3). Values with different letters in the same column are different (p < 0.05).

**Table S4.** TBA values ( $\mu\text{g MDA/ mL}$ ) of the Brazil nut beverage treated by HPH (T1, T2 and T3) and pasteurization (PAS) and stored at 5 °C for 21 days

| Samples |                  | Day 0                          | Day 9                        | Day 21                       |
|---------|------------------|--------------------------------|------------------------------|------------------------------|
| BNB     | (untreated)      | 0.97 $\pm$ 0.04 <sup>BC</sup>  | **                           | **                           |
| PAST    | (63 °C, 30 min)  | 0.87 $\pm$ 0.02 <sup>aAB</sup> | 0.96 $\pm$ 0.02 <sup>a</sup> | 0.93 $\pm$ 0.02 <sup>a</sup> |
| T1      | (75 °C, 50 MPa)  | 0.95 $\pm$ 0.01 <sup>aBC</sup> | 0.97 $\pm$ 0.04 <sup>a</sup> | 0.95 $\pm$ 0.09 <sup>a</sup> |
| T2      | (55 °C, 150 MPa) | 0.82 $\pm$ 0.06 <sup>aA</sup>  | 0.77 $\pm$ 0.05 <sup>a</sup> | 0.75 $\pm$ 0.08 <sup>a</sup> |
| T3      | (25 °C, 180 MPa) | 1.03 $\pm$ 0.03 <sup>aC</sup>  | 1.07 $\pm$ 0.04 <sup>a</sup> | 1.02 $\pm$ 0.01 <sup>a</sup> |

The data are provided as mean value  $\pm$  standard deviation (n = 3). Values with different letters, lowercase in row or uppercase in column (day 0), are different (p < 0.05).
